# Supplementary material
Source: Springer Nature journal article supplement (https://www.springerprofessional.de/resource/supplementary/13638_2011_303_MOESM11_ESM.pdf/11898162)

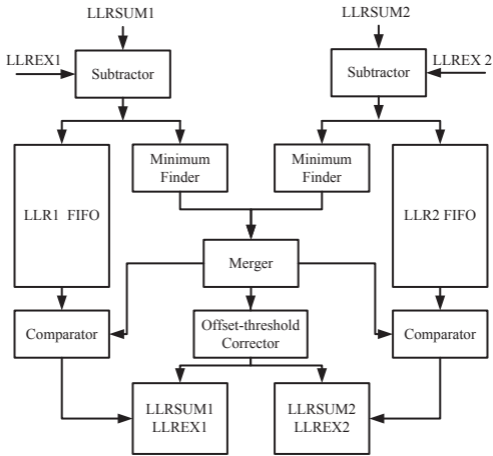

Supplement: MOESM11 [file 11898162]
